# Supplementary material
Source: MDPI journal article supplement (https://www.mdpi.com/1424-2818/14/8/629)
Supplement: s1 [file s1]

Supplementary materials to Komarova et al.

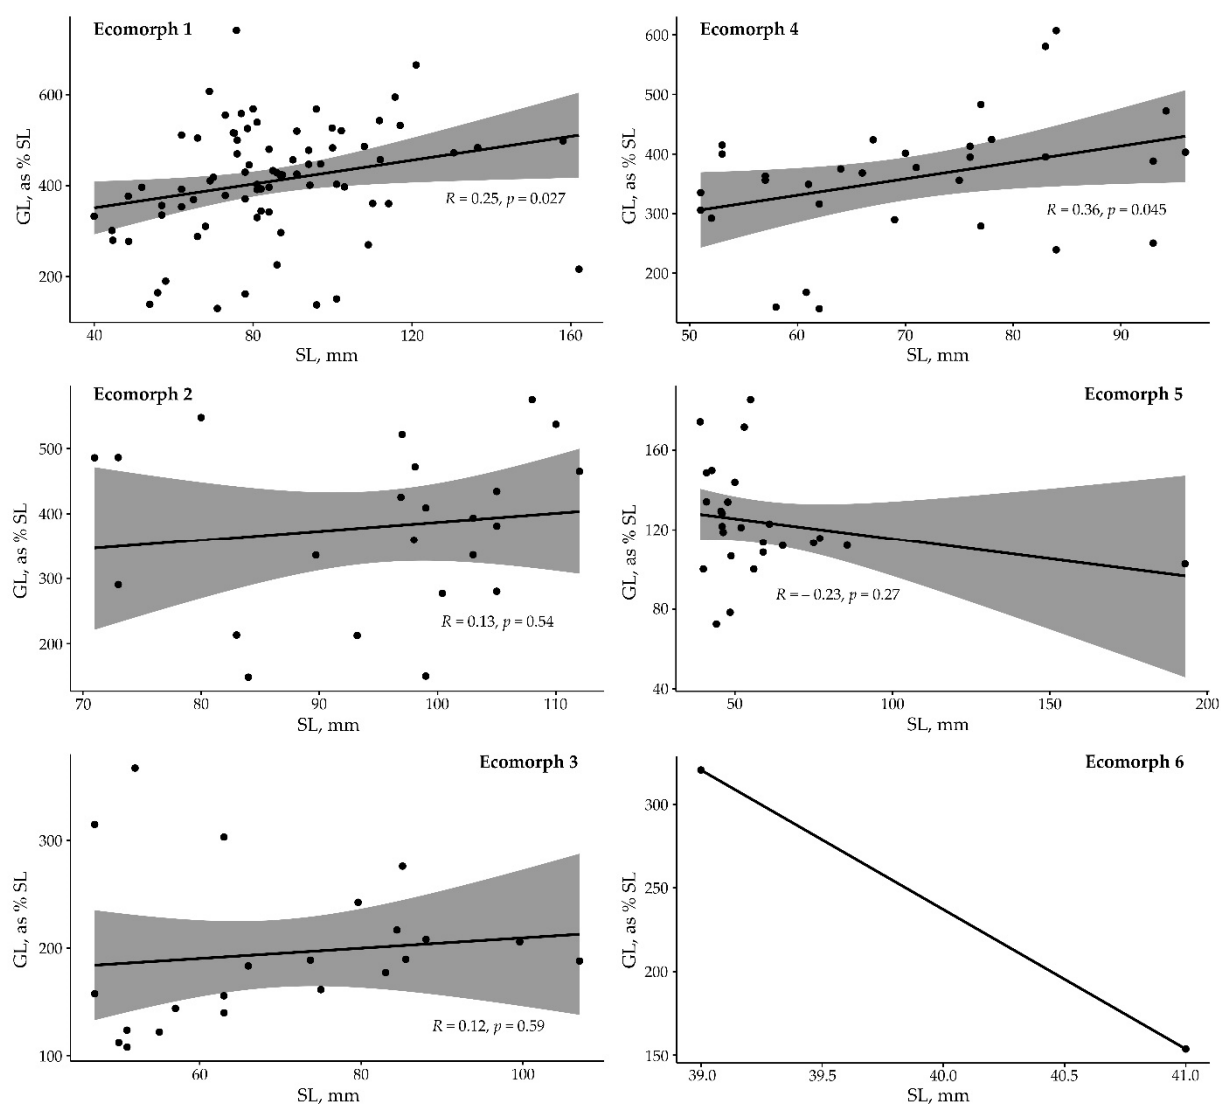

**Figure S1.** Pearson correlation of body length (SL, mm) and gut length (as % SL) in six ecomorphs of the genus *Garra* from the Sore River.

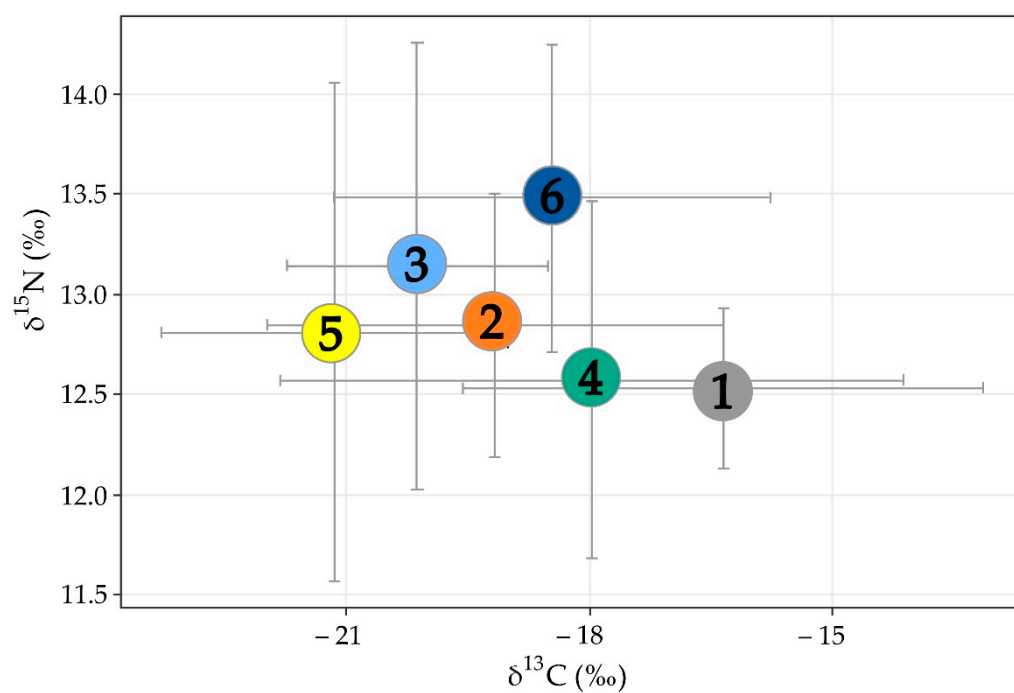

**Figure S2.** Biplots of stable isotope composition (mean  $\delta^{13}\text{C}$  and  $\delta^{15}\text{N}$  values  $\pm$  SD) in the sympatric ecomorphs of the genus *Garra* from the Sore River (subset includes all individuals,  $n = 83$ ).

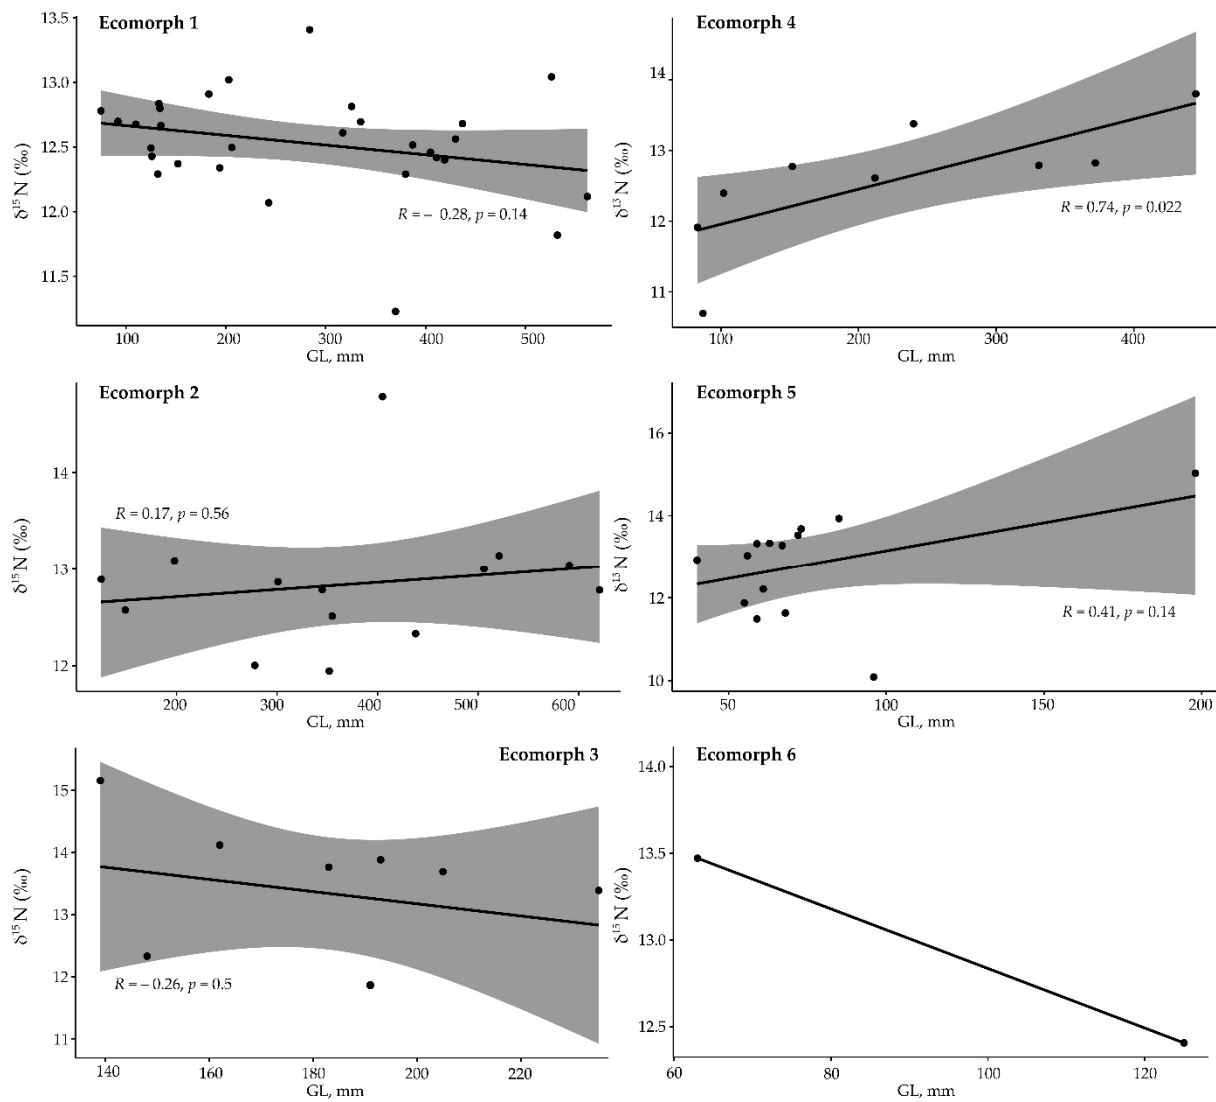

**Figure S3.** Pearson correlation of  $\delta^{15}\text{N}$  values and the gut length in six *Garra* ecomorphs from the Sore River.

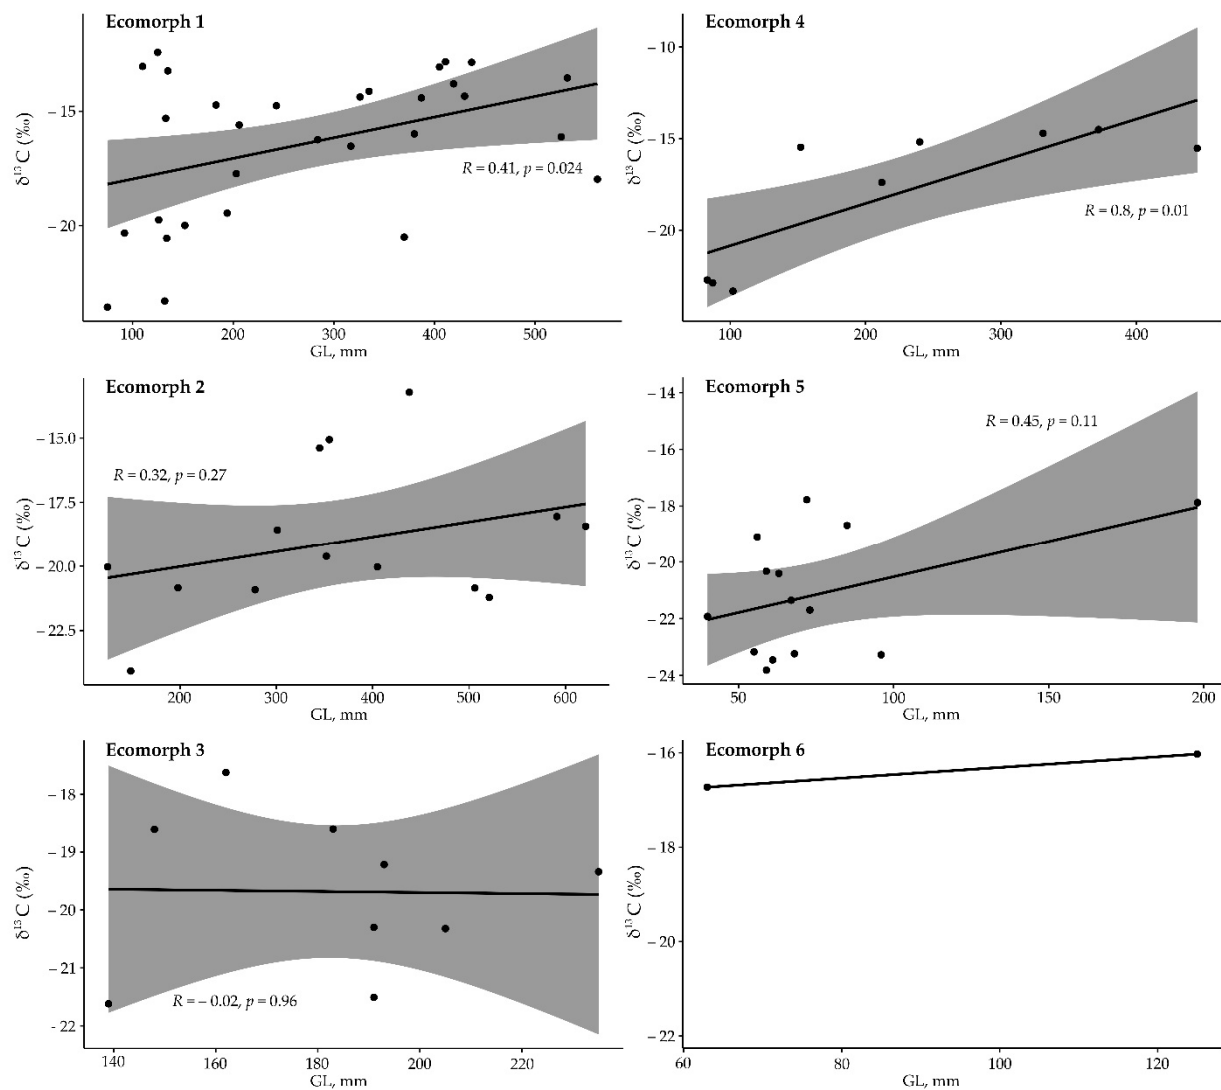

**Figure S4.** Pearson correlation of  $\delta^{13}\text{C}$  values and the gut length in six *Garra* ecomorphs from the Sore River.

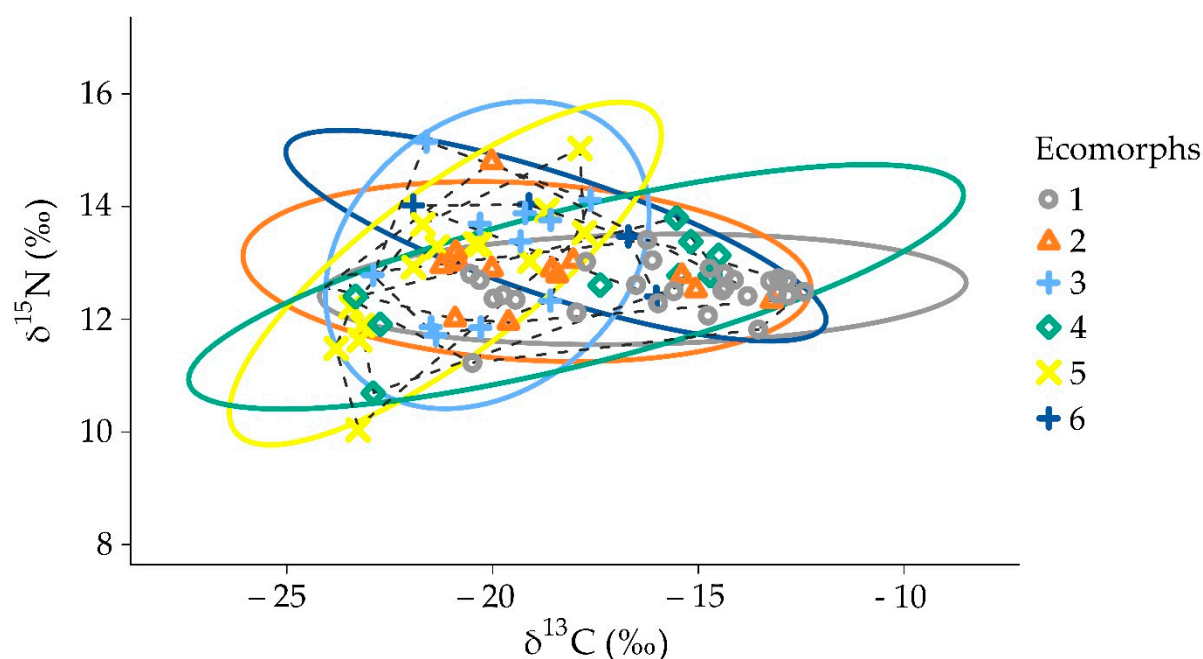

**Figure S5.** Stable isotope Bayesian ellipses showing trophic niche widths and overlaps in sympatric ecomorphs of the genus *Garra* from the Sore River (subset includes all individuals,  $n = 83$ ). Ellipses with 95% credible intervals for the means are based on standard ellipses corrected for small sample sizes (SEAc; isotopic niche metrics; SIBER package). Each mark corresponds to the isotopic values. A broken line connects the extreme points in each sample and delineate total area (TA). The ecomorphs (1-6) are colored by the same colors as in Figure S2.

**Table S1.** Estimated isotopic niche areas in the sympatric *Garra* ecomorphs from the Sore River (subset includes all individuals,  $n = 83$ ); TA, SEA, and SEAc (SIBER package) – the total area of convex hull, standard ellipse area, and corrected standard ellipse with a correction for small sample sizes, respectively.

| Ecomorphs | 1     | 2     | 3     | 4     | 5     | 6    |
|-----------|-------|-------|-------|-------|-------|------|
| TA        | 15.45 | 15.61 | 11.58 | 12.12 | 12.55 | 3.40 |
| SEA       | 4.01  | 5.69  | 5.44  | 7.01  | 4.91  | 3.91 |
| SEAc      | 4.16  | 6.13  | 6.04  | 8.01  | 5.32  | 5.87 |

**Table S2.** Niche overlap estimates (NicheROVER package) showing posterior probabilities ( $\alpha = 0.95$ ) that individuals from rows will be found within the niches indicated by the column header. Results (%) are provided for sympatric *Garra* ecomorphs from the Sore River (subset includes all individuals,  $n = 83$ ).

| Ecomorphs | 1     | 2     | 3     | 4     | 5     | 6     |
|-----------|-------|-------|-------|-------|-------|-------|
| 1         | NA    | 82.05 | 40.14 | 82.09 | 22.77 | 40.61 |
| 2         | 66.70 | NA    | 69.50 | 73.16 | 53.90 | 43.30 |
| 3         | 42.58 | 74.75 | NA    | 56.80 | 76.33 | 39.42 |
| 4         | 63.72 | 69.42 | 50.87 | NA    | 37.75 | 29.68 |
| 5         | 38.24 | 66.74 | 78.45 | 59.45 | NA    | 27.70 |
| 6         | 42.69 | 80.23 | 66.63 | 55.85 | 50.32 | NA    |

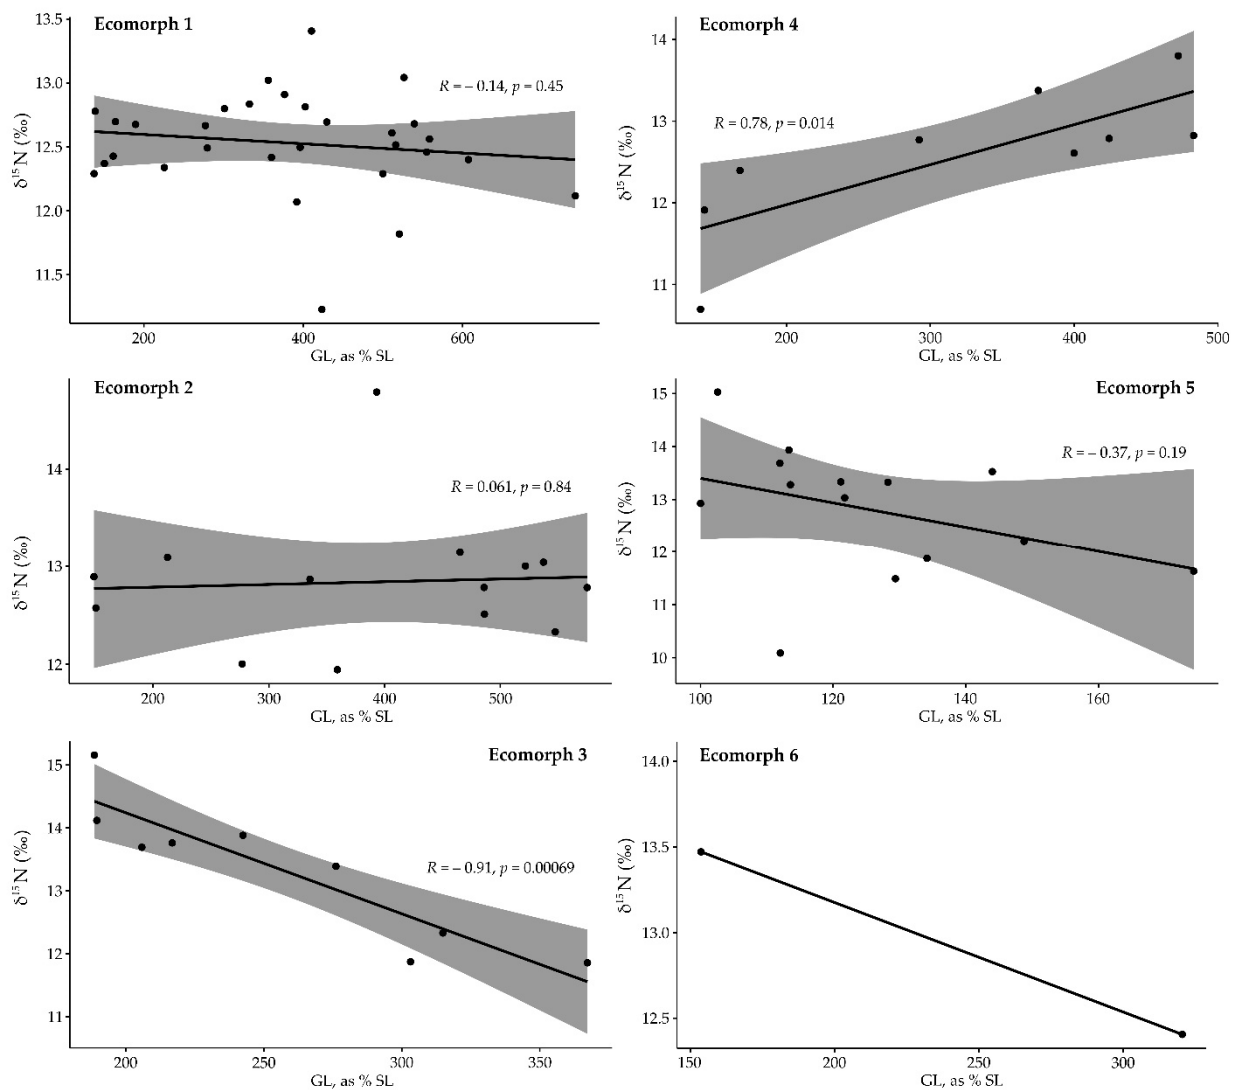

**Figure S6.** Pearson correlation of the relative gut length (as % to SL) and  $\delta^{15}\text{N}$  values in six ecomorphs of the genus *Garra* from the Sore River.

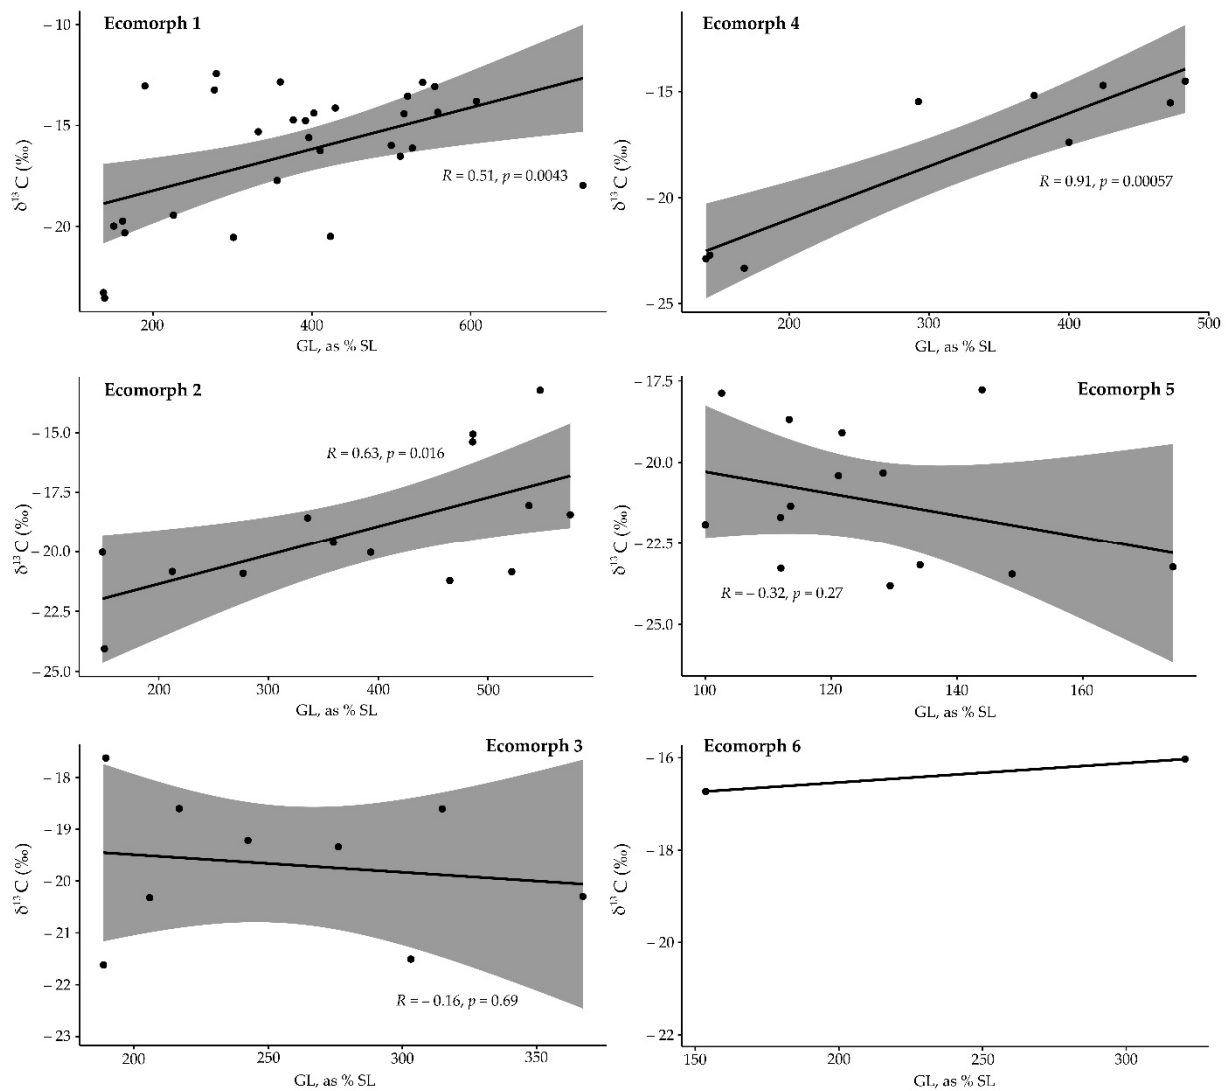

**Figure S7.** Pearson correlation of the relative gut length (as % to SL) and  $\delta^{13}\text{C}$  values in six ecomorphs of the genus *Garra* from the Sore River.

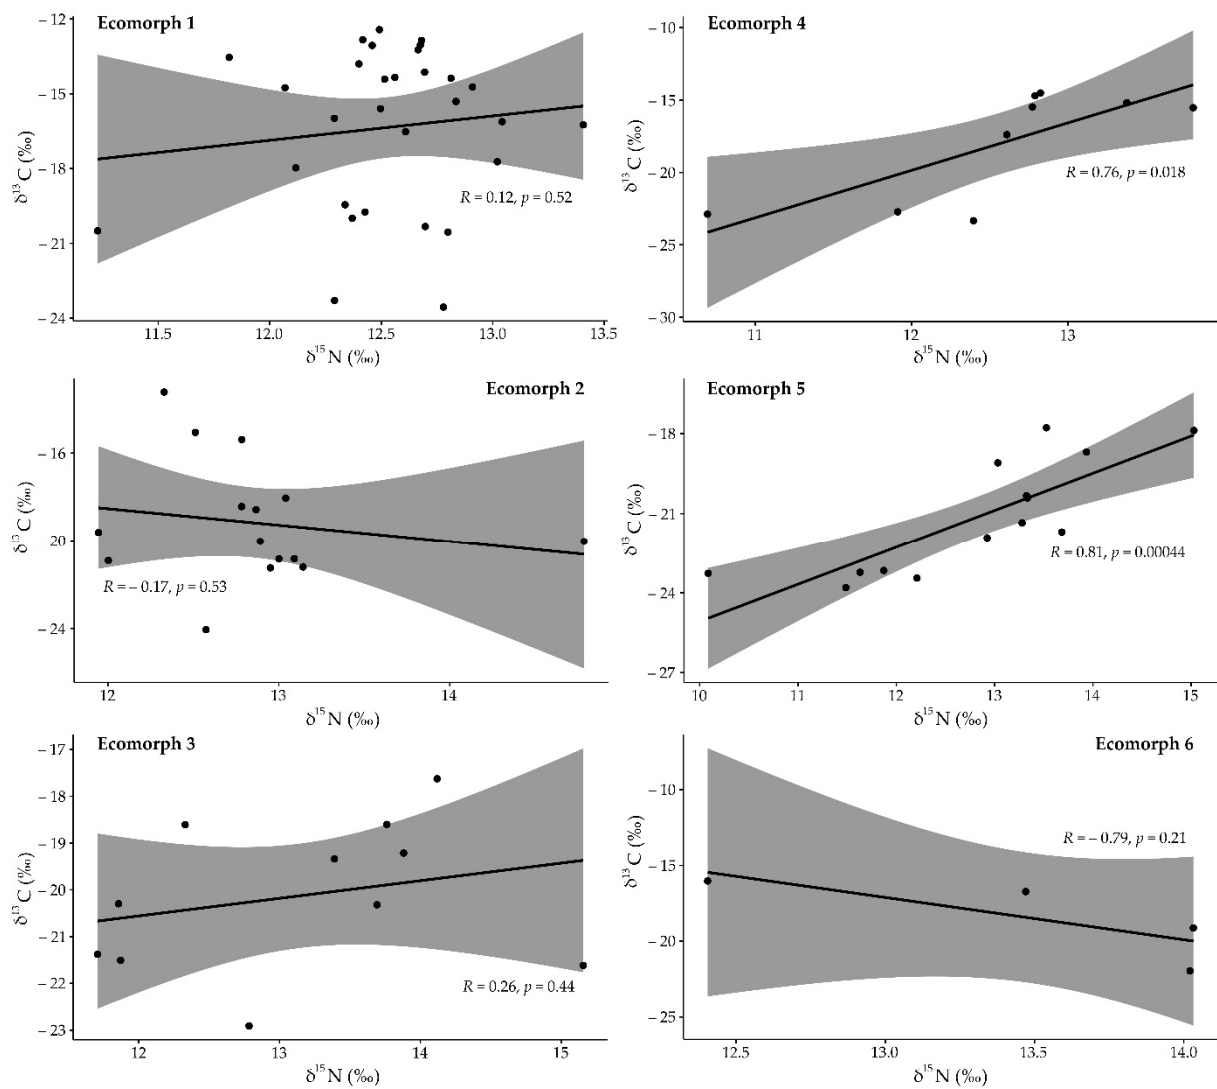

**Figure S8.** Pearson correlation of  $\delta^{13}\text{C}$  and  $\delta^{15}\text{N}$  values in six ecomorphs of the genus *Garra* from the Sore River.
